# Supplementary material
Source: HighWire-hosted journal article supplement (https://erj.ersjournals.com/content/59/3/2200096)
Supplement: inline-supplementary-material-1 [file inline-supplementary-material-1.pdf]

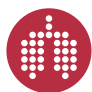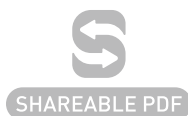

# The coexistence of asthma and COPD: some considerations about prevalence and lung function decline

Alessandro Marcon , Francesca Locatelli and Simone Accordini

Unit of Epidemiology and Medical Statistics, Dept of Diagnostics and Public Health, University of Verona, Verona, Italy.

Corresponding author: Alessandro Marcon ([alessandro.marcon@univr.it](mailto:alessandro.marcon@univr.it))

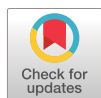

Shareable abstract (@ERSpublications)

**Mounting evidence suggests that FEV<sub>1</sub> decline is slower among patients with COPD and asthma compared to those with COPD alone** <https://bit.ly/33NyoJq>

**Cite this article as:** Marcon A, Locatelli F, Accordini S. The coexistence of asthma and COPD: some considerations about prevalence and lung function decline. *Eur Respir J* 2022; 59: 2200096 [DOI: 10.1183/13993003.00096-2022].

This single-page version can be shared freely online.

Copyright ©The authors 2022.  
For reproduction rights and  
permissions contact  
[permissions@ersnet.org](mailto:permissions@ersnet.org)

Received: 13 Jan 2022  
Accepted: 16 Jan 2022

*To the Editor:*

With great interest we read the editorial by MANNINO [1] regarding the investigation on the coexistence between asthma and COPD that we conducted using data from the population-based European Community Respiratory Health Survey (ECRHS) [2]. The ECRHS is an international cohort study based on two-stage sampling, where a 20% random sample of participants in a postal screening was invited to take part in a clinical assessment, along with a sample enriched for subjects with respiratory symptoms [3]. After a motivating historical view on the concept of asthma–COPD overlap, the author underlined how a more comprehensive understanding of the heterogeneity and complexity of this condition might help reshaping clinical decision-making and result in more precise disease treatment.
